# Supplementary material
Source: PubMed Central journal article supplement (PMC3089571)
Supplement: supp_M110.168500_jbc.M110.168500-1.pdf [file supp_M110.168500_jbc.M110.168500-1.pdf]

### Supplementary Figure 1 Plaza-Menacho et al.

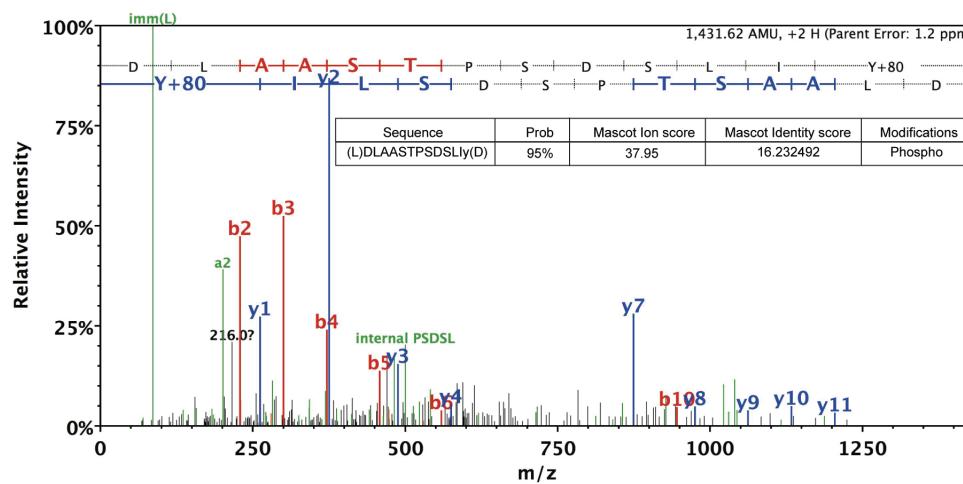

Mass spectrometry spectra of recombinant RET intracellular domain (residues 698-1072) stimulated with ATP (5 mM) and MgCl<sub>2</sub> (10 mM) for 15 min. digested with AspN enzyme. Data shows phosphorylation of Tyr1029 as indicated by the phospho-specific tyrosine ion reporter 216.0. The inset shows sequence identified, Mascott ion and identity scores of the tyrosine modification.

## Supplementary Figure 2 Plaza-Menacho et al.

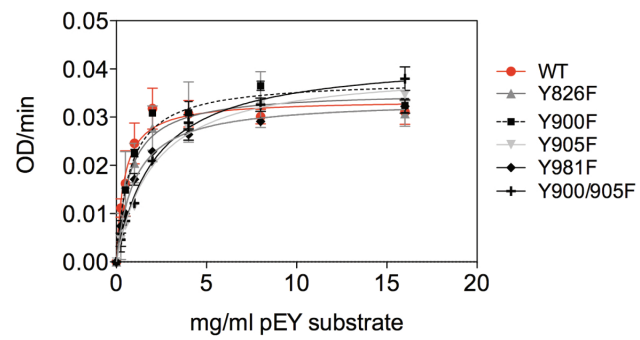

Enzymatic assay performed with soluble RET WT kinase domain (residues 705-1013, 5  $\mu$ g) and the indicated mutants incubated with the indicated concentrations of polyGlu-Tyr (pEY) peptide. Data shown (mean  $\pm$  SEM) from 6 replicates is representative of 2 independent experiments using different protein batches.

### Supplementary Figure 3 Plaza-Menacho et al.

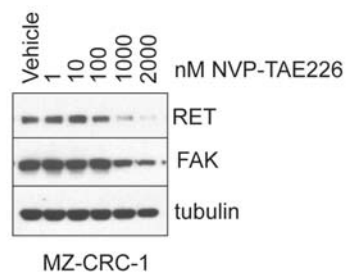

The FAK inhibitor NVP-TAE226 reduced RET protein level in MEN2B tumour cells. Whole cell extracts from serum-starved (overnight) human MZ-CRC-1 tumour cell lines treated with increasing amounts of NVP-TAE226 or vehicle-treated cell (DMSO control, 1:1000) for 96 hours were analyzed by Western blotting using the indicated antibodies.
